# Supplementary material for: The Potential Impact of Myofascial Release Therapy on Iliotibial Band Syndrome: A Preliminary Randomised Controlled Trial
Source: Research Square preprint supplement (doi:10.21203/rs.3.rs-6377617/v1), 2025-05-09
Supplement: Supplementary file 1 [file 5be33889885a2230b34b99a1.docx]

| **TABLE 1. Primary Outcomes at Each Data-Collection Time Point** | | | |
| --- | --- | --- | --- |
| Outcomes/Time Point | Experimental Group(n=8) | Control Group(n=8) | P Value |
| Kujala |  |  |  |
| Baseline | 83.38 (7.86) | 84.88 (8.95) | 0.727 |
| Week 2 | 91.50 (4.24) | 92.00 (5.93) | 0.849 |
| Week 4 | 96.00 (1.93) | 95.12 (3.36) | 0.533 |
| Week 8 | 98.25 (1.67) | 96.37 (3.20) | 0.164 |
| VAS(cm) |  |  |  |
| Baseline | 5.38 (1.51) | 4.63 (1.77) | 0.376 |
| Week 2 | 1.88 (0.84) | 3.13 (0.74) | 0.007* |
| Week 4 | 1.25 (0.89) | 1.88 (0.79) | 0.159 |
| Week 8 | 0.94 (1.08) | 1.63 (0.92) | 0.192 |
| ITB thickness (mm) |  |  |  |
| Baseline | 4.16 (0.64) | 4.45 (0.55) | 0.356 |
| Week 4 | 3.55 (0.45) | 4.21 (0.48) | 0.013* |

Abbreviations:ITB, iliotibial band; Kujala, Kujala scale test; VAS, visual analogue score test;

Value are Mean (SD);

P Value show the results of Post-hoc analyses (Bonferroni comparisons) ;

* indicates a significant between-group difference at same time point.
